# Supplementary material for: Developing a complex intervention to support pregnant women with mild to moderate anxiety: application of the Medical Research Council framework
Source: Research Square preprint supplement (doi:10.21203/rs.3.rs-39833/v2), 2020-10-29
Supplement: Supplementary file 1 [file 1f9ec525ca235a4c590ca21e.docx]

**Developing a complex intervention to support pregnant women with mild to moderate anxiety: application of the Medical Research Council framework**

**Authors**

**Dr Kerry EVANS**

Floor 12, Tower Building, School of Health Sciences, University of Nottingham.

Kerry.evans1@nottingham.ac.uk

**Professor Helen SPIBY**

Floor 12, Tower Building, School of Health Sciences, University of Nottingham.

Helen.spiby@nottingham.ac.uk

**Dr Jane MORRELL**

QMC Campus, School of Health Sciences, University of Nottingham. NG7 2HA

Jane.morrell@nottingham.ac.uk

**Contact details for the corresponding author:**

Kerry Evans

School of Health Sciences

University of Nottingham

12th Floor Tower Building

Nottingham
NG7 2RD

Kerry.evans1@nottingham.ac.uk

No conflict of interest has been declared by the authors.

**Funding**

The study was completed as part of a Doctoral Training Fellowship award from Wellbeing of Women and the Royal College of Midwives and is supported by PZ Cussons ‘Mum & Me’.
